# Supplementary material for: Thyroid cancer risk prediction model using m6A RNA methylation regulators: integrated bioinformatics analysis and histological validation
Source: publisher site journal article supplement (doi:10.18632/aging.204525), 2023-02-14
Supplement: Supplementary file [file aging-v15i3-204525-supplementary-material-SD1.pdf]

**SUPPLEMENTARY FIGURES**

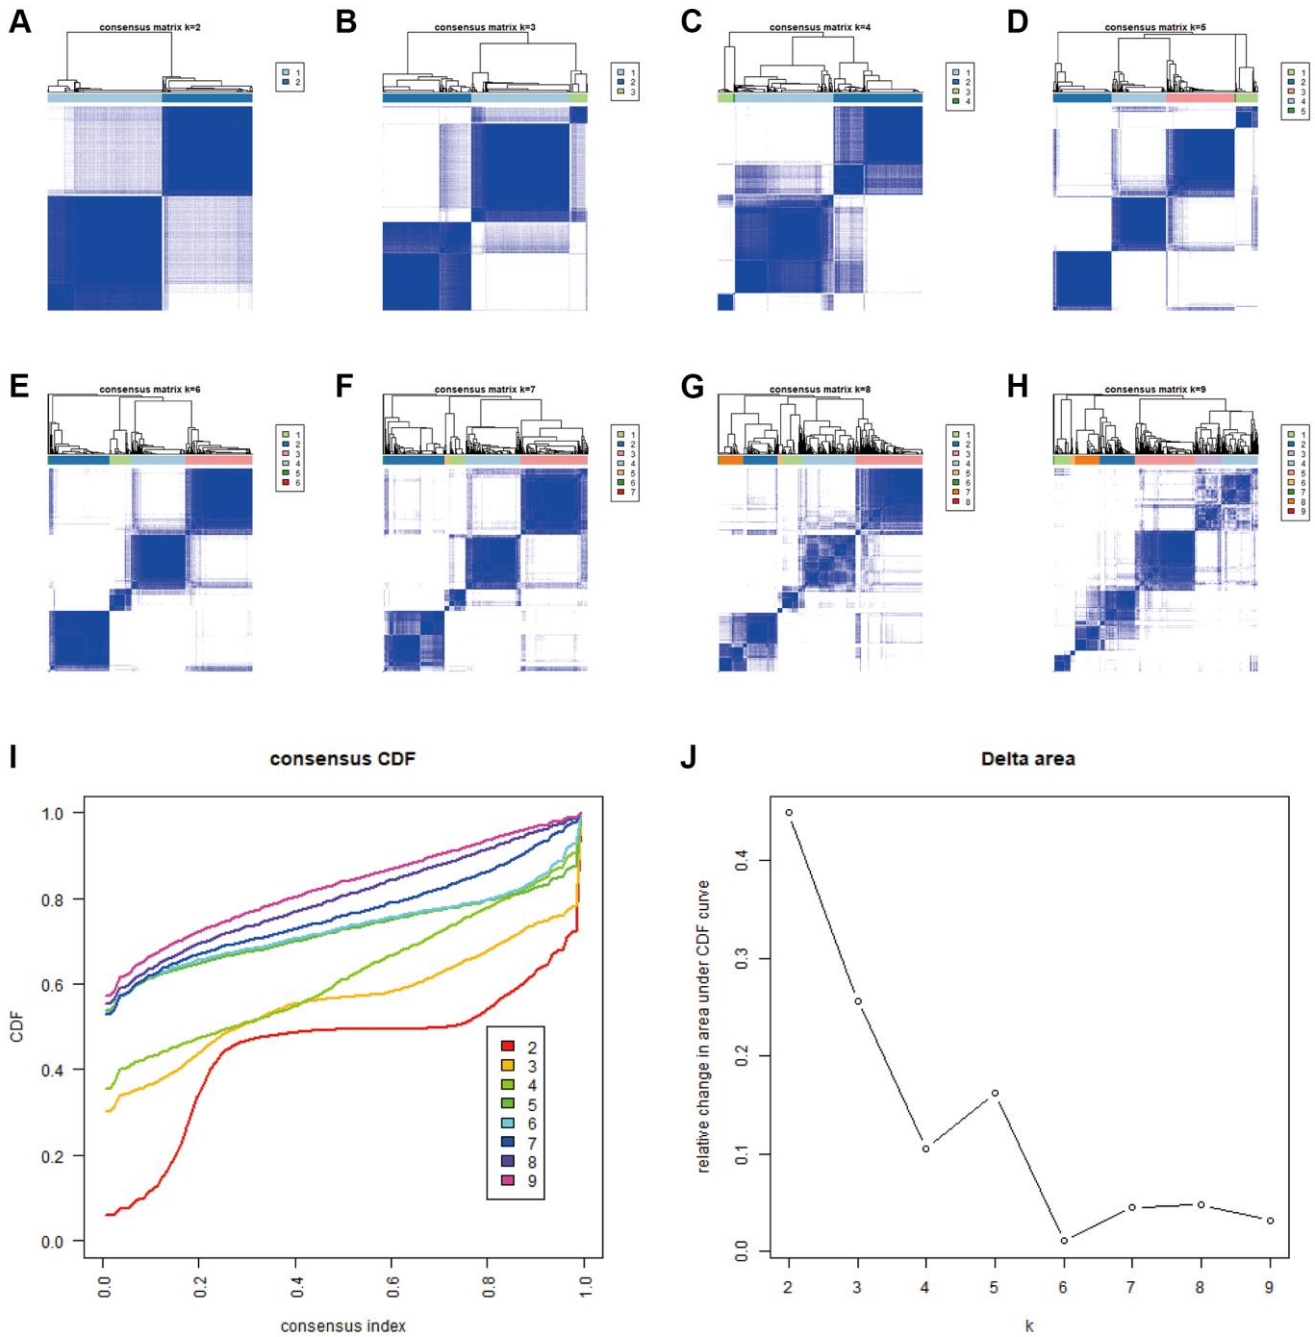

**Supplementary Figure 1. Consensus clustering analysis of m6A modification clusters.** (A–H) Consensus matrices of the patients with sarcoma for  $k = 2$ – $9$ . (I) Cumulative distribution function (CDF) of consensus clustering analysis. (J) Relative change in area under the CDF curve of consensus clustering analysis.

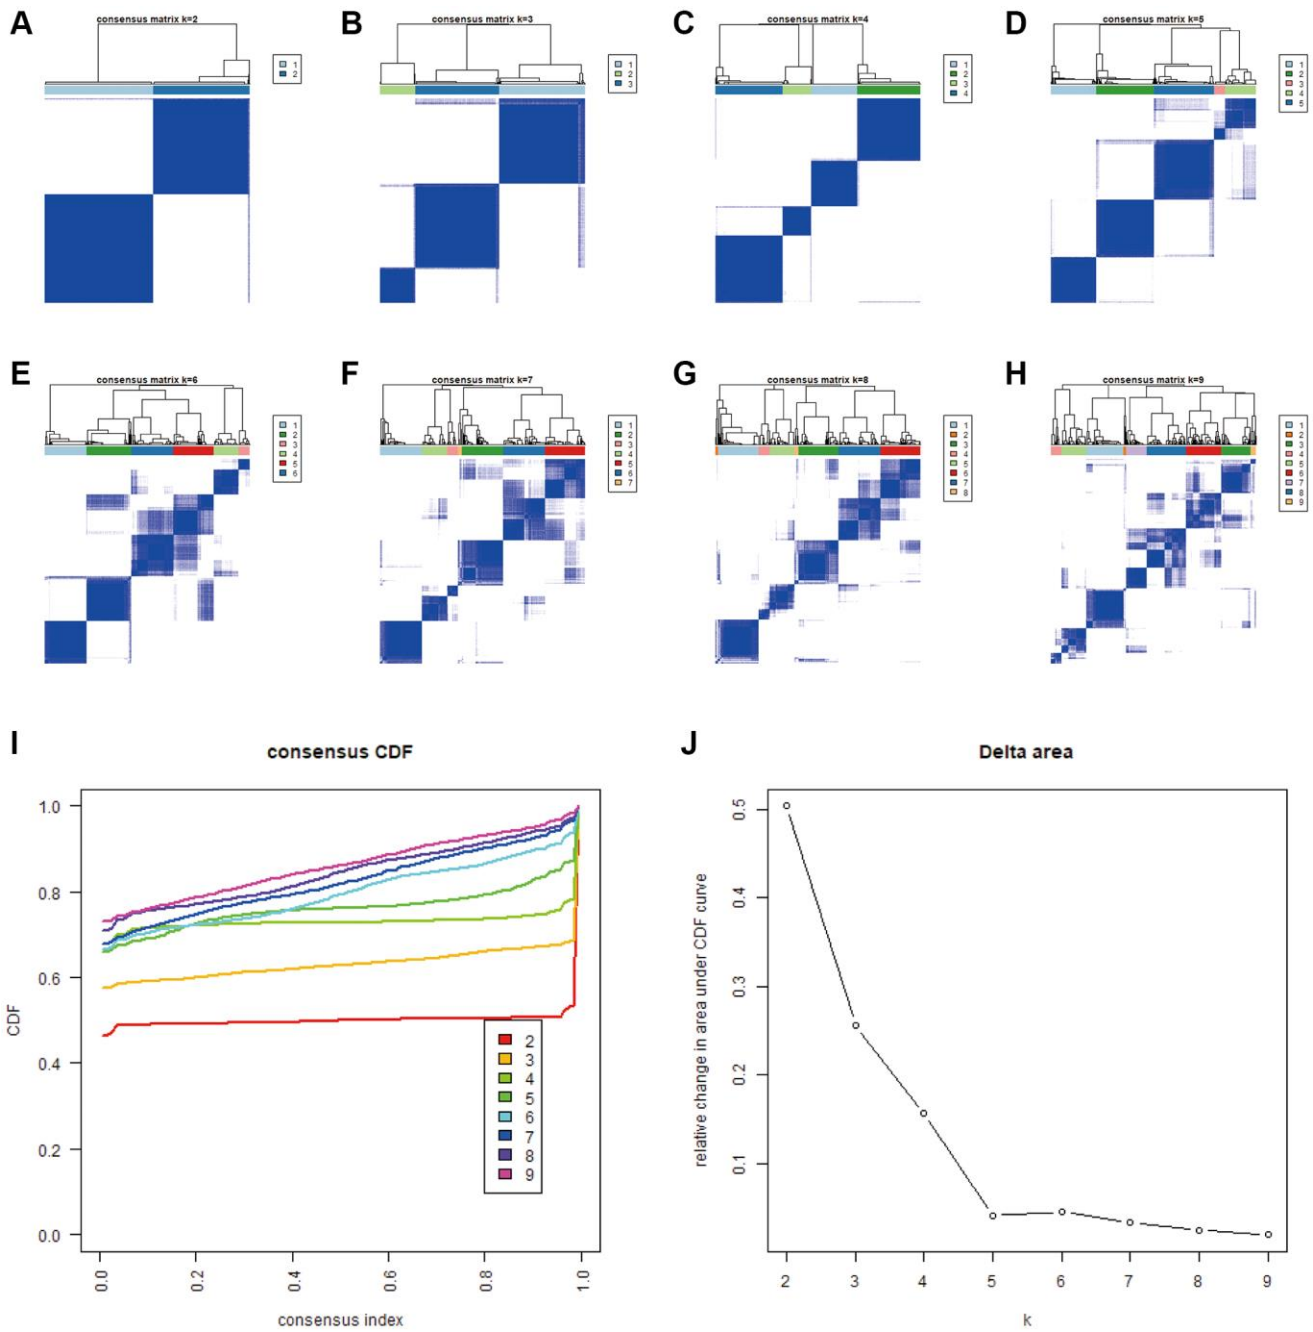

**Supplementary Figure 2. Consensus clustering analysis of m6A gene clusters.** (A–H) Consensus matrices of the patients with sarcoma for  $k = 2$ –9. (I) CDF of consensus clustering analysis. (J) Relative change in area under the CDF curve of consensus clustering analysis.
